# Supplementary material for: PARP-2 domain requirements for DNA damage-dependent activation and localization to sites of DNA damage
Source: PubMed Central journal article supplement — Nucleic Acids Res. 2015 Dec 23;44(4):1691–702. doi: 10.1093/nar/gkv1376 (PMC4770219; doi:10.1093/nar/gkv1376), 2015-12-23
Supplement: supp_gkv1376_nar-02241-d-2015-File007.pdf [file supp_gkv1376_nar-02241-d-2015-File007.pdf]

# Supplementary Figures

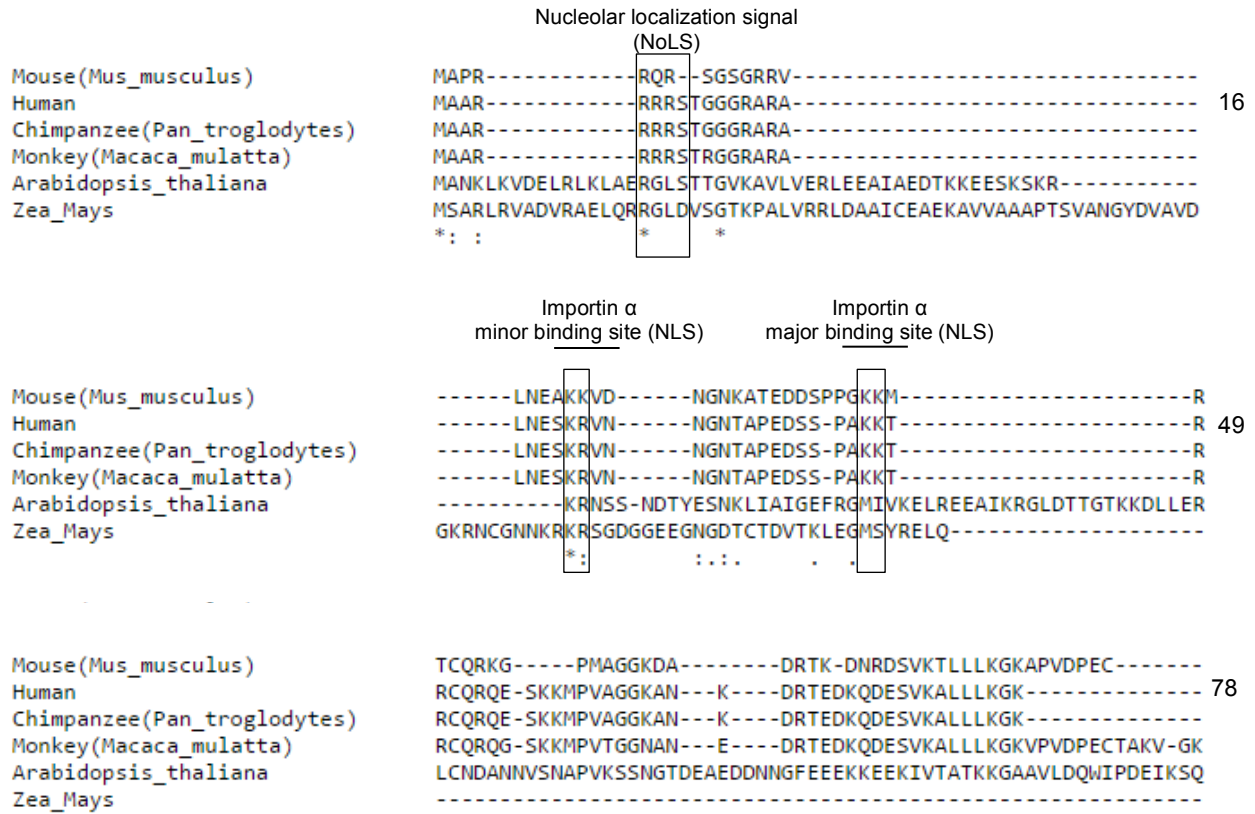

**Supplementary Figure S1: Sequence alignment.** ClustalW sequence analysis of human, mouse (*Mus musculus*), chimpanzee (*Pan troglodytes*), monkey (*Macaca mulatta*), *Arabidopsis thaliana*, and *Zea mays* PARP-2. The human PARP-2 nucleolar localization signal (NoLS), residues 4-7, is highlighted (16). Additionally, the regions of human PARP-2 bipartite NLS, which are necessary for contact with Importin  $\alpha$  1, as indicated by the crystal structure (Figure 3) have been highlighted.

gap SSB

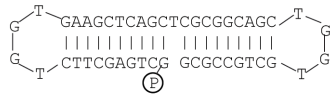

gap SSB

### Fluorescence Polarization

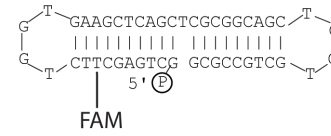

DSB

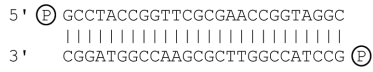

DSB

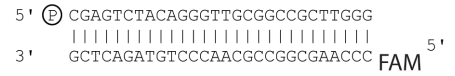

nick SSB

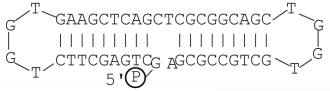

nick SSB

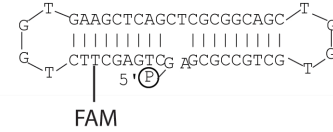

**Supplementary Figure S2: Oligonucleotides.** Sequence and structure of DNA sequences used in this study.

# DSB

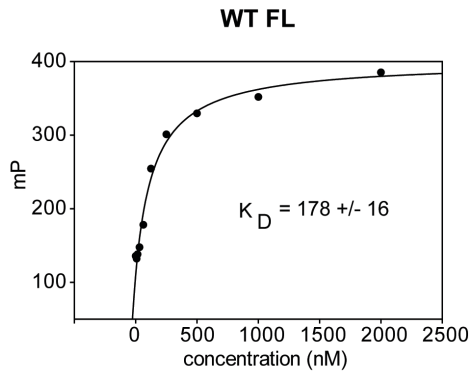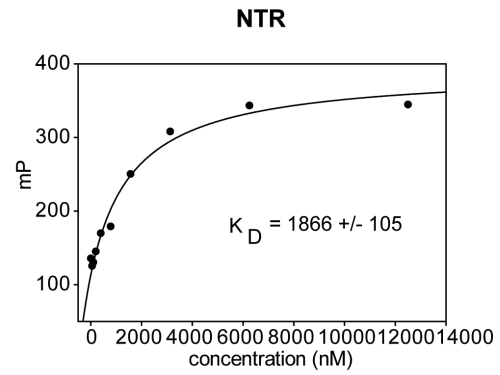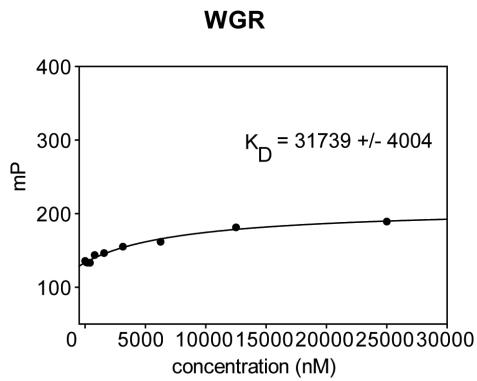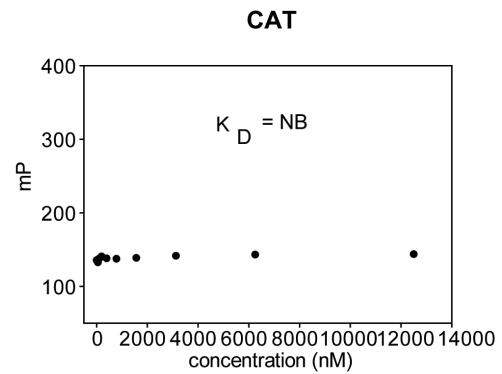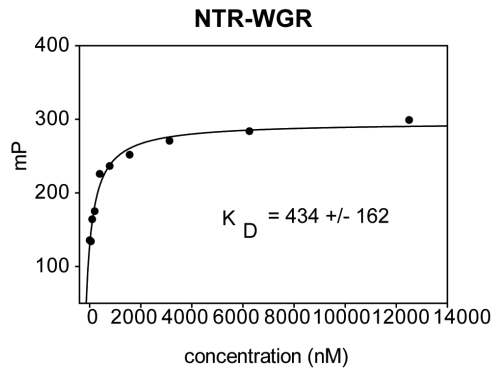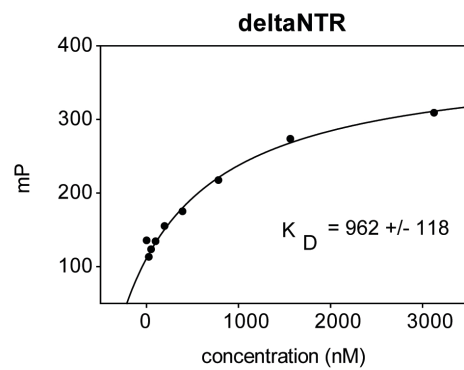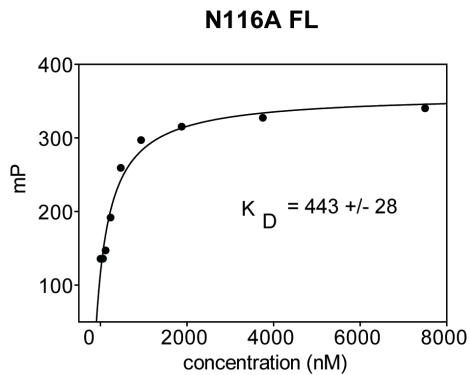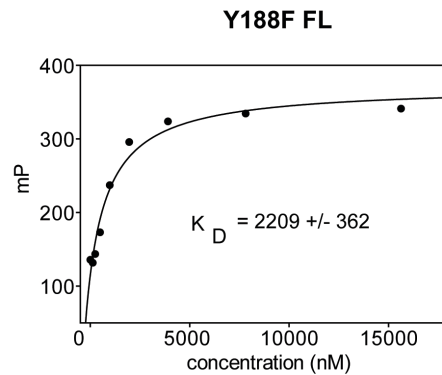

**Supplementary Figure S3: Fluorescence Polarization DNA binding experiments of PARP-2 WT, PARP-2 truncations and mutations.** A. A fluorescently labeled 28 duplex carrying a 5' P (5 nM) was titrated with PARP-2 WT, truncations, or mutations. An example of a binding assay is shown for each protein. NB indicates construct had no measurable binding affinity.

# SSB nick

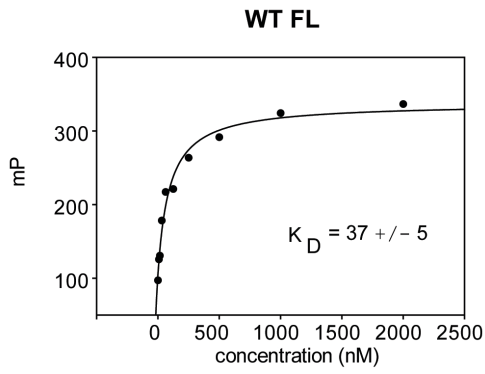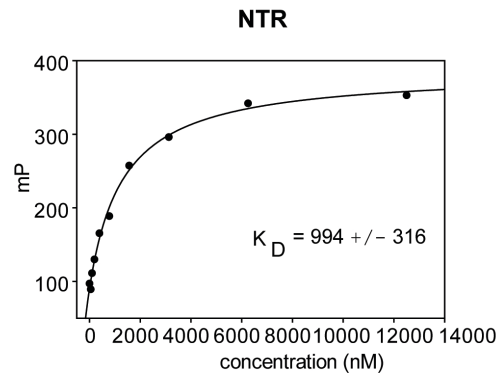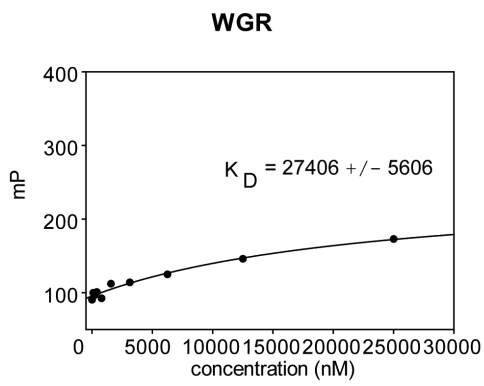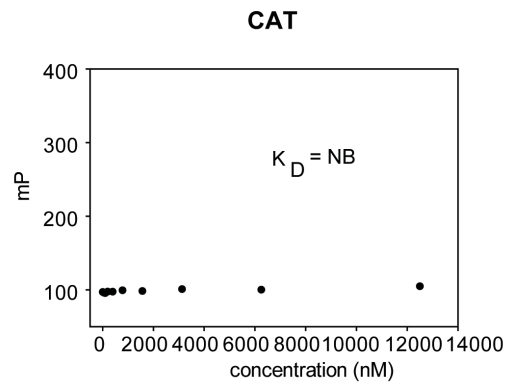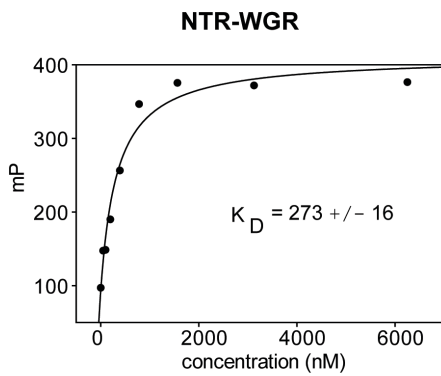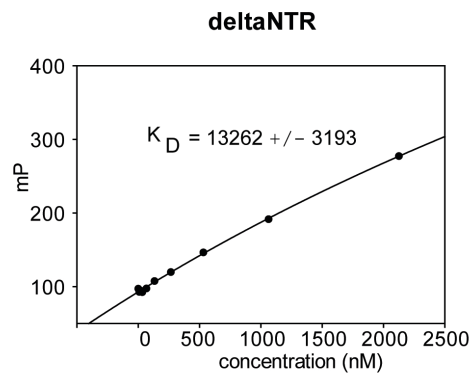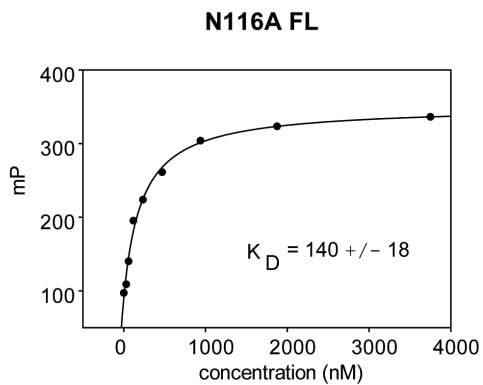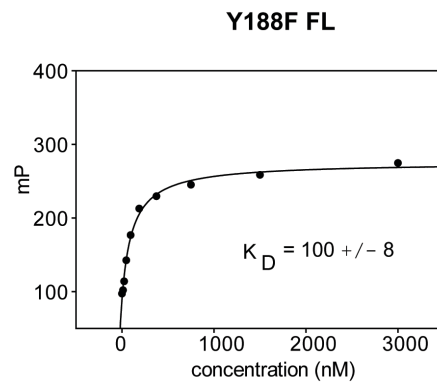

**Supplementary Figure S4: Fluorescence Polarization DNA binding experiments of PARP-2 WT, PARP-2 truncations and mutations.** A. A fluorescently labeled dumbbell nick DNA carrying a 5' P (5 nM) was titrated with PARP-2 WT or truncations. An example of a binding assay is shown for each protein. NB indicates construct had no measurable binding affinity.

SSB gap

WT FL

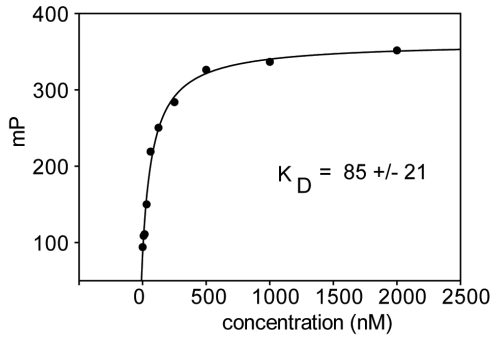

NTR

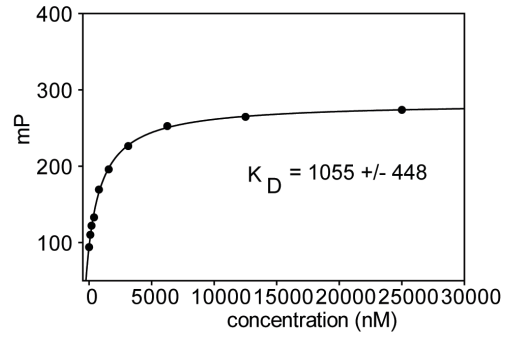

WGR

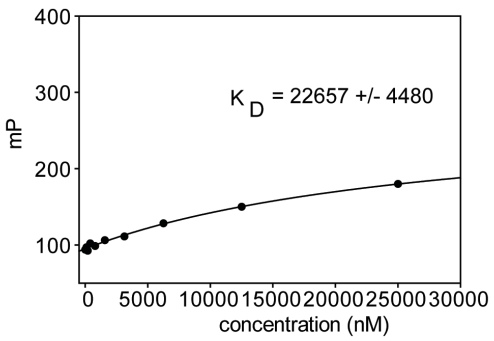

CAT

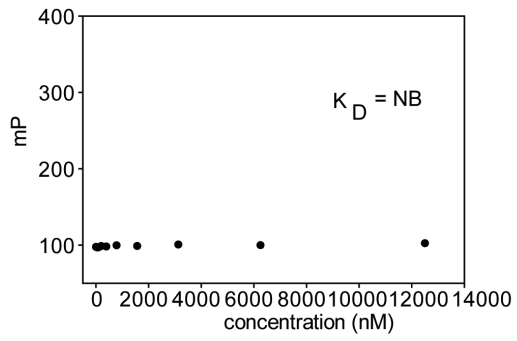

NTR-WGR

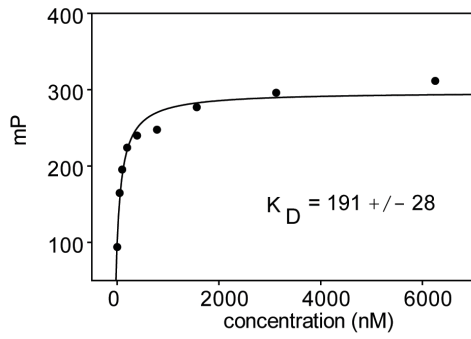

deltaNTR

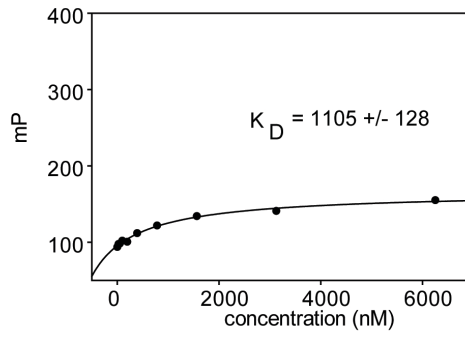

N116A FL

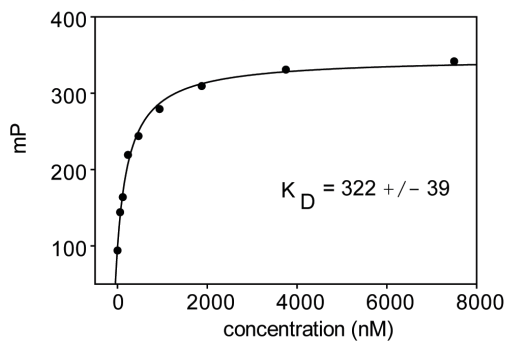

Y188F FL

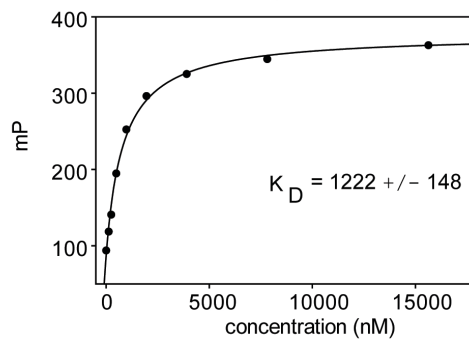

**Supplementary Figure S5: Fluorescence Polarization DNA binding experiments of PARP-2 WT, PARP-2 truncations and mutations.** A. A fluorescently labeled dumbbell gap DNA carrying a 5' P (5 nM) was titrated with PARP-2 WT, truncations, or mutations. An example of a binding assay is shown for each protein. NB indicates construct had no measurable binding affinity.



**A**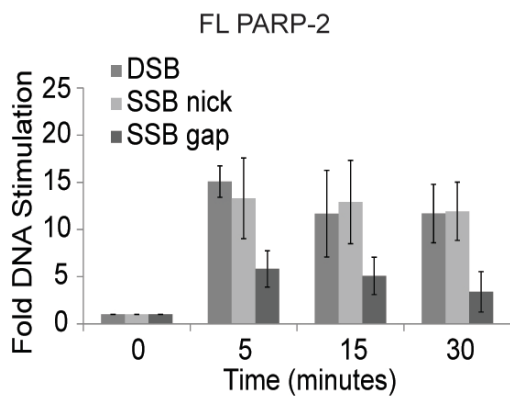**B**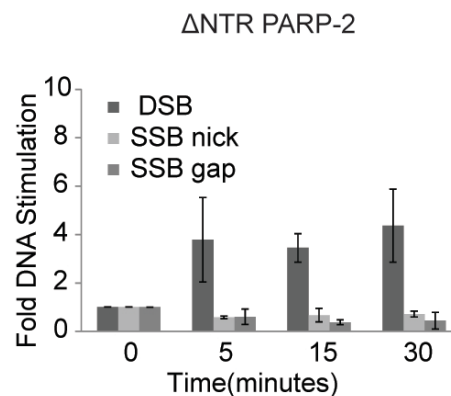

**Supplementary Figure S6: Structure specific requirement of PARP-2 NTR.** PARP-2 DNA-dependent activity was measured using a colorimetric assay. FL PARP-2 (panel A) and  $\Delta$ NTR (WGR-CAT) (panel B) (60 nM) were incubated with various DNA templates (480 nM). Stimulation is calculated as the ratio of activity measured in the presence *versus* the absence of DNA. The average of three or more independent experiments is shown with the associated standard deviations.

**A**

**PARP-1 Zn1**

MAESSDKLYRVEYAKSGRAS  
CKKCSSESIPKDSLRLMAMVQ  
SPMFDGKVPHWYHFSCFWKV  
GHSIRHPDVEVDGFSELRWD  
DQQKVKKTAEAGGVTG

**PARP-2 NTR**

MAARRRRSTGGGRARALNES  
KRVNNGNTAPEDSSPAKKTR  
RCQRQESKKMPVAGGKANKD  
RTEDKQDESVKALLLK GK

**B**

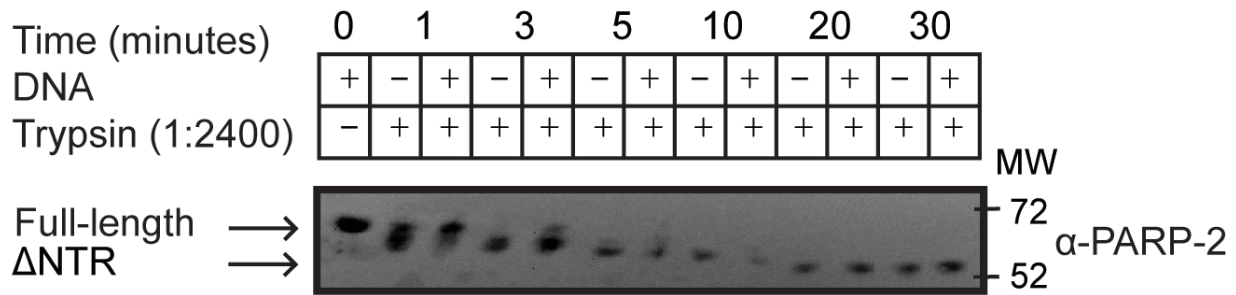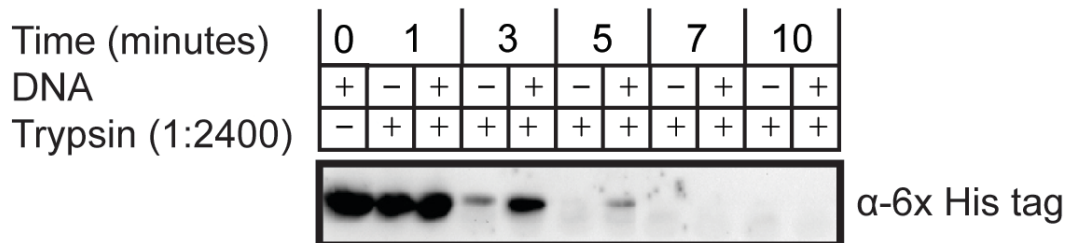

## Differential Scanning Fluorimetry

C

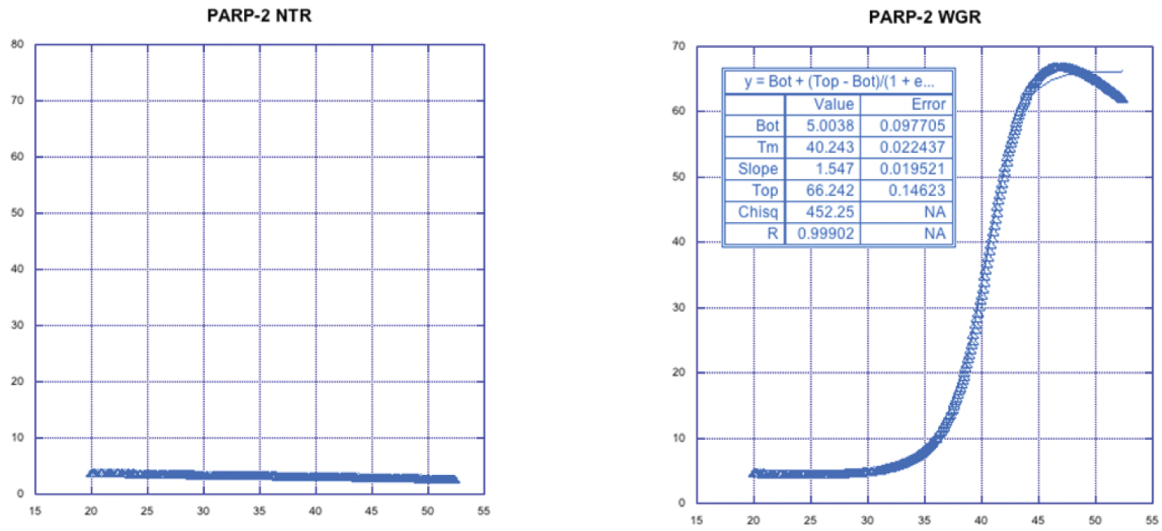

D

## Gel Filtration

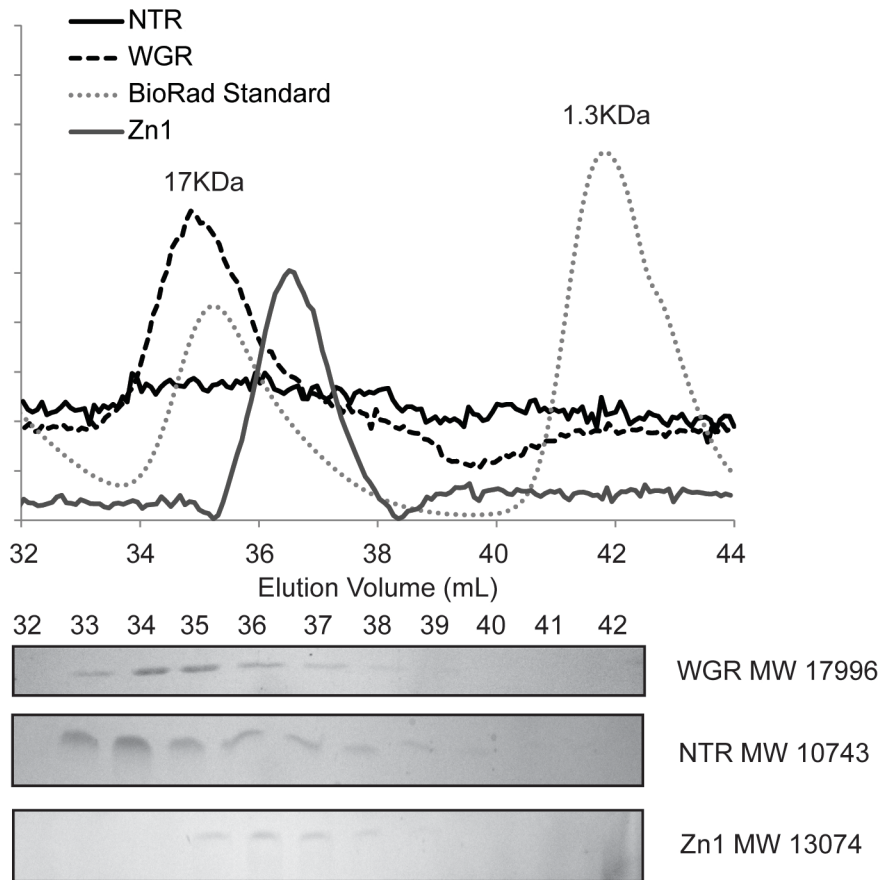

**Supplementary Figure S7: PARP-2 NTR is natively disordered.** A. Basic residues of PARP-2 NTR and PARP-1 Zn1. Amino acid sequence of PARP-1 Zn1 (1-96) (top) and PARP-2 NTR (1-78) (bottom) arginine and lysine residues (potential trypsin cleavage residues) are highlighted. B. Western blot analysis of FL PARP-2 was resolved on 7.5% SDS-PAGE and then transferred onto Hybond-ECL nitrocellulose membrane (GE Healthcare). Membranes were treated for 1 hour at room temperature in blocking buffer comprised of Tris-buffered saline with tween (TBST, 20 mM Tris pH 7.5, 150 mM NaCl, 0.1% Tween 20) and 5% Blocking-Grade buffer (Bio-Rad) for the anti-PARP-2 experiment or Blocking Reagent (5 Prime) for the anti-histidine tag experiments, in both cases according to the manufacturer's protocols. Membranes were incubated 1 hour at room temperature with an anti-PARP-2 antibody (1:900) (Abcam), or an HRP-conjugated anti-hexahistidine tag antibody (1:2000) in their respective blocking buffers and washed with TBST. Anti-PARP-2 was then incubated with HRP conjugated donkey anti-rabbit (1:5000) (Santa Cruz Biotechnology) in 1% Blocking-Grade buffer in TBST. Finally, the membranes were washed with TBST, developed with SuperSignal West Pico Chemiluminescent Substrate (Thermo Scientific), and imaged on a Gel Doc system (Bio-Rad). A representative image of three independent experiments is shown. Top: The anti-PARP-2 western blot shows a decrease in molecular weight (MW) of FL PARP-2 upon trypsin digest. The PARP-2 catalytic domain is preserved, as indicated by the anti-PARP-2. Anti-PARP-2 antibody detects residues within the C-terminus of human PARP-2. Bottom: The anti-histidine tag western blot shown a decrease in signal of the histidine tag corresponding to a loss of the N-terminal region. C. Left: Representative example of differential scanning fluorimetry (DSF) of PARP-2 NTR (10 $\mu$ M). Right: Representative melting curve of PARP-2 WGR (10 $\mu$ M) obtained by DSF. Data was fit to a sigmoid model utilizing Kaleidagraph software (Synergy). The  $T_M$  of PARP-2 WGR is 40.3 $\pm$  0.09 $^\circ$ C. DSF experiments were done in triplicate. D. PARP-2 Analytical Gel Filtration shows elution profile consistent with elongated structure. The dotted lines show two molecular weight markers (Bio-Rad Gel Filtration) at 17kDa and 1.3kDa. The black solid line shows the elution profile of PARP-2 NTR (3 $\mu$ g). The black dashed line and the gray solid line show PARP-2 WGR domain (1 $\mu$ g) and PARP-1 Zn1 domain (1 $\mu$ g) elution profiles respectively. Fractions were resolved at a rate of 0.5mL/min and collected in 0.5mL fractions. Fractions collected for analysis by SDS-PAGE. Fractions collected for analysis by SDS-PAGE are shown below chromatography and the elution volume indicated. The respective molecular weight (MW) are shown with the PARP-2 or PARP-1 truncation to the right of the SDS-PAGE analysis.

**A Importin  $\alpha$  PARP-2 Crystals**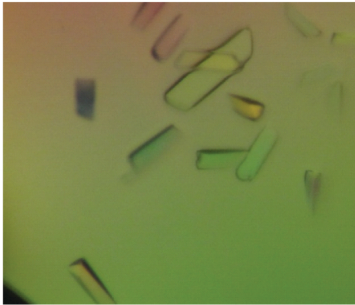**B Crystal Wash Test**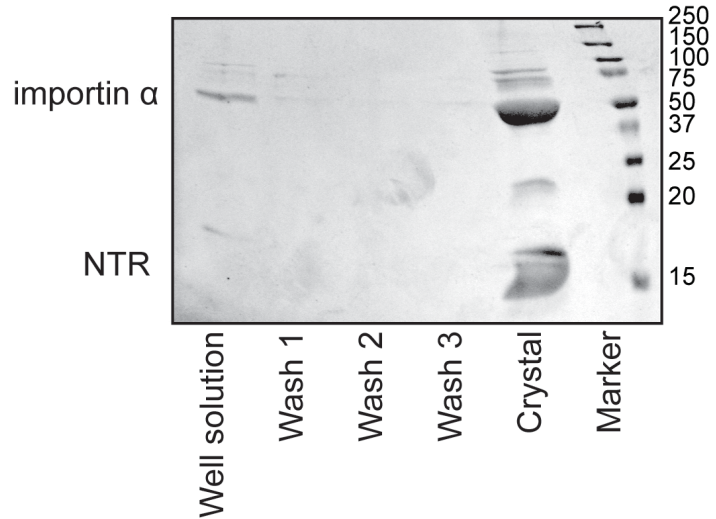**C**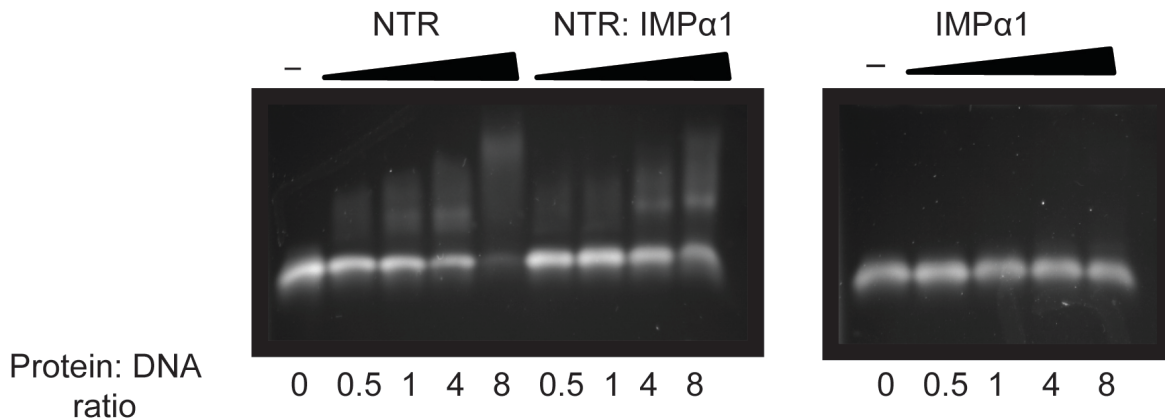

**Supplementary Figure S8: PARP-2 NTR:IMP $\alpha$  crystallization.** A. Crystals of PARP-2 NTR bound to IMP $\alpha$ . B. SDS-PAGE analysis of PARP-2 NTR:importin crystals. Crystals were washed in excess well buffer then dissolved in 6x SDS loading buffer. Samples were boiled at 95°C for 5 minutes. SDS-PAGE (18%) was stained with Imperial Stain (Thermo Fischer). C. Electrophoretic mobility shift assay (EMSA) of NTR bound to IMP $\alpha$ . The gel shift assay was performed using 0.5  $\mu$ M SSB nick DNA and varied protein concentration as indicated by the protein:DNA ratio. Reactions were incubated for 30 minutes at room temperature in 50 mM Tris pH 7, 100 mM NaCl, 0.1 mM TCEP, 0.1 mM EDTA, and 5% glycerol. Reactions were run on a 0.9% agarose gel for 35 minutes at 100V at 4°C in Tris-Borate buffer. The gel was next stained in ethidium bromide for 5 minutes.

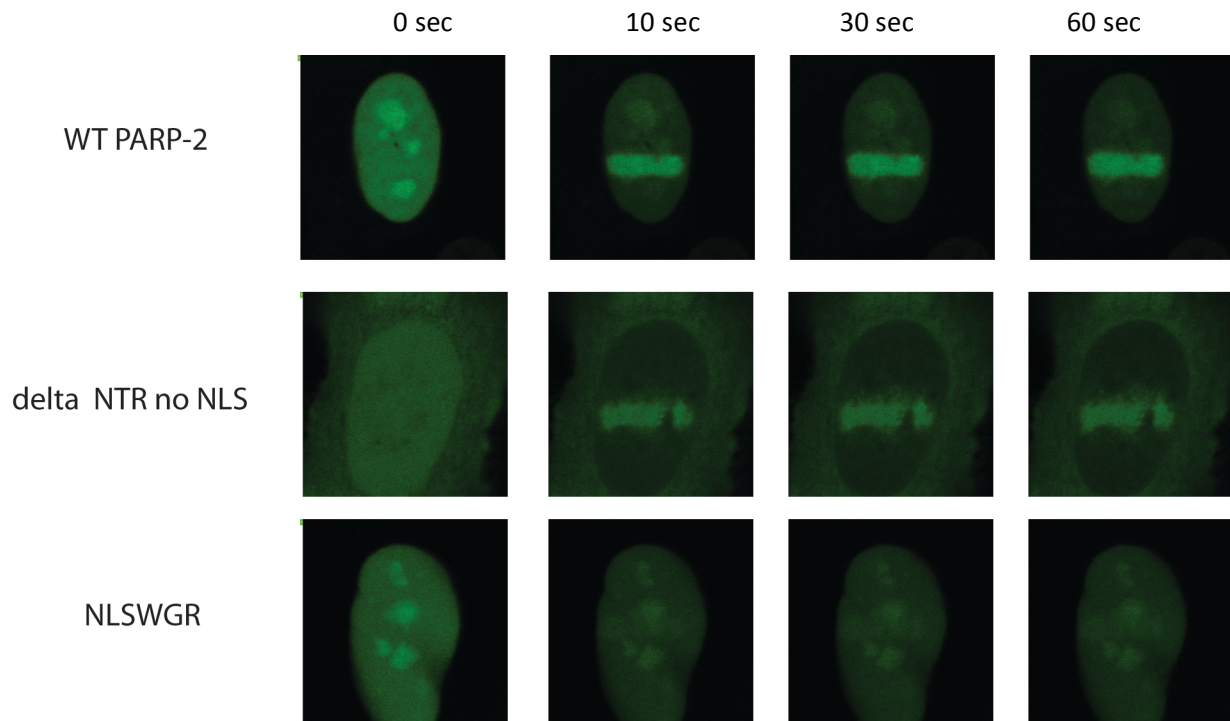

**Supplementary Figure S9: hPARP-2 recruitment to cellular sites of DNA damage A.** GFP-PARP-2 and truncations expressed in HeLa cells. Live-cell imaging recruitment to sites of laser induced DNA damage. Cellular images are representative images from at least three independent experiments. NLS is an N-terminal peptide SV40T NLS tethered to PARP-2 truncations that lack the canonical NLS of hPARP-2. The SV40T NLS sequence is PPKKKRKVEDPG.
